# Supplementary material for: Alanine Scanning Mutagenesis of the MEDI4893 (Suvratoxumab) Epitope Reduces Alpha Toxin Lytic Activity In Vitro and Staphylococcus aureus Fitness in Infection Models
Source: PubMed Central journal article supplement (PMC6201083; doi:10.1128/aac.01033-18), 2018-10-24
Supplement: zac011187594s1.pdf [file zac011187594s1.pdf]

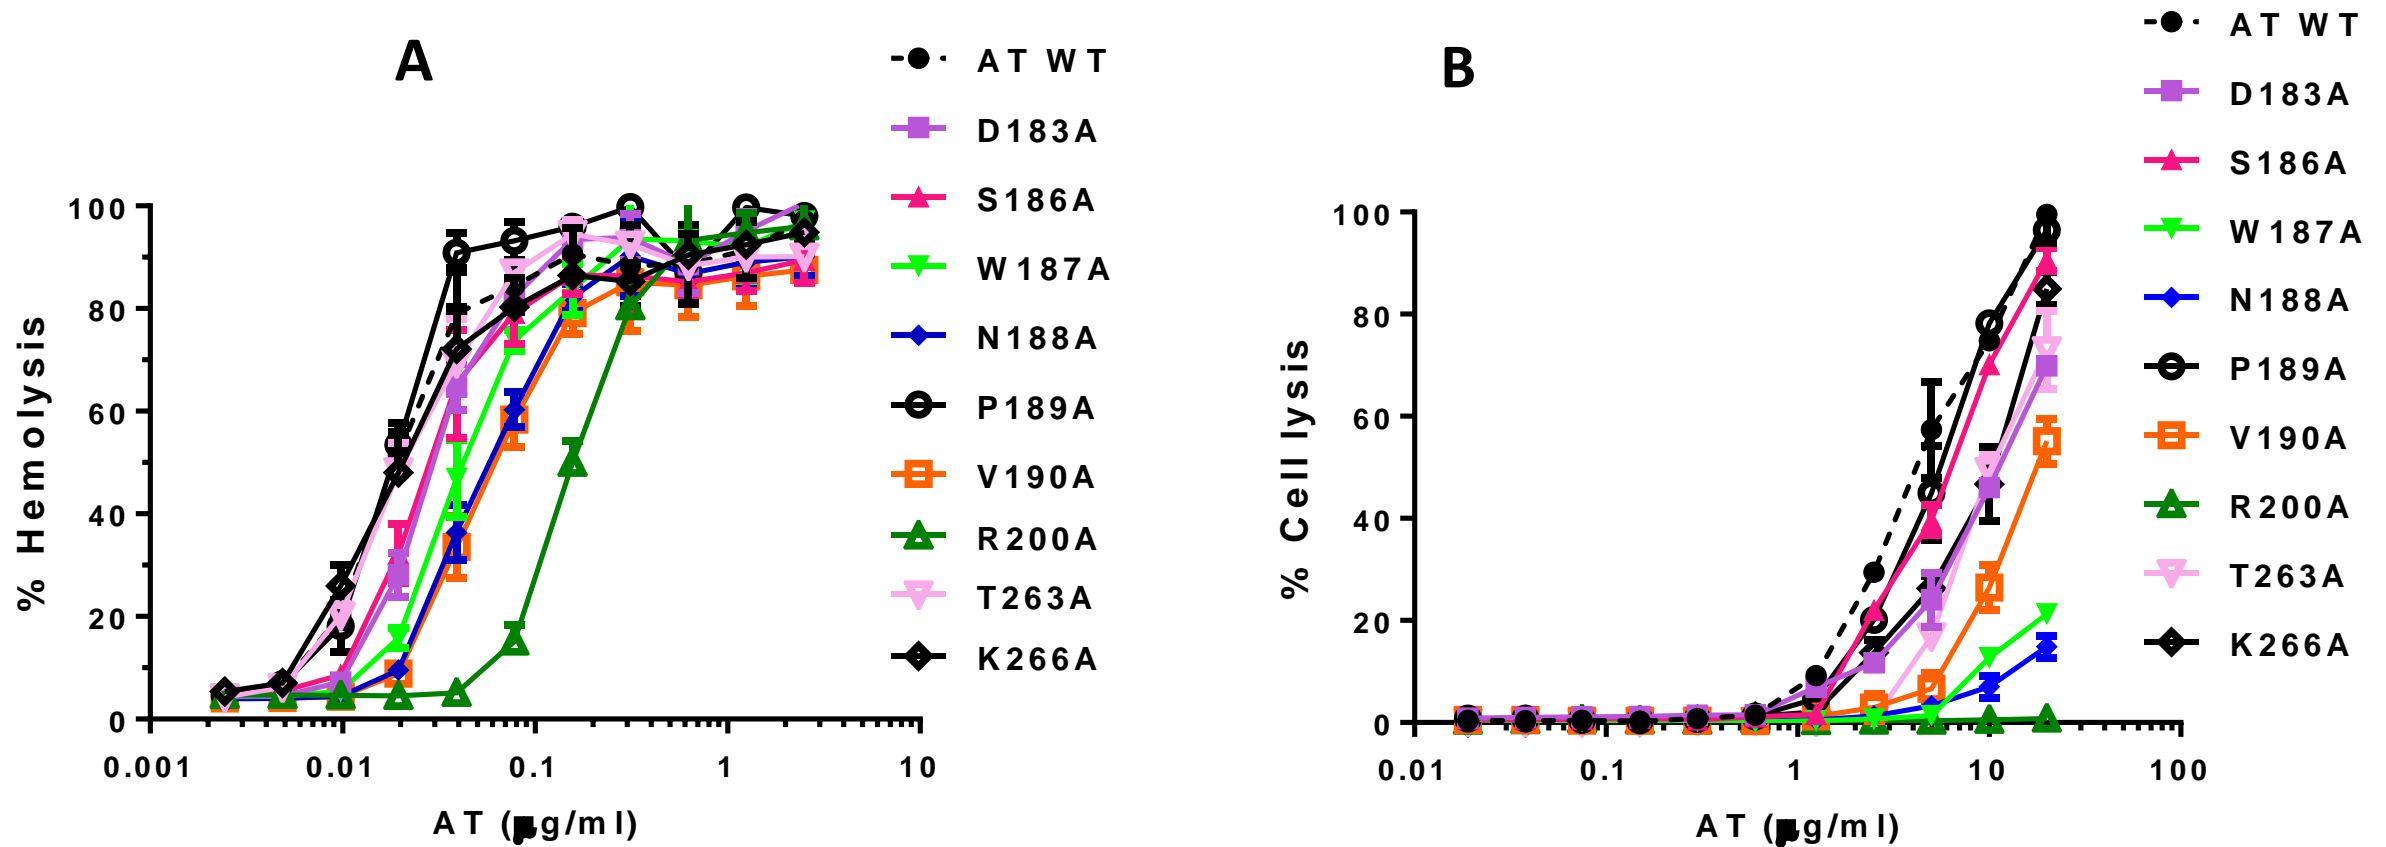

**Fig. S1: AT mutant lytic activity on rabbit RBC (A) and human A549 cell line (B).** (A) Washed RBCs were incubated with serial dilutions of AT WT or AT mutants (2.5 to 0.0024 $\mu\text{g/ml}$ ). Hemolysis was measured by the amount of hemoglobin released in the supernatant, and calculated as followed:  $100 \cdot [(\text{OD}_{\text{AT}}) / (\text{OD}_{\text{SDS}})]$ . (B) A549 were incubated with serial dilutions of AT WT or AT mutants (20 to 0.01 $\mu\text{g/ml}$ ). LDH was measured in supernatants after two hour incubation at 37°C. % cytolysis was calculated as follows:  $100 \cdot [100 - (\text{OD}_{\text{AT}}) / (\text{OD}_{\text{SDS}})]$ . Results are a mean of triplicates and representative of two separate experiments.

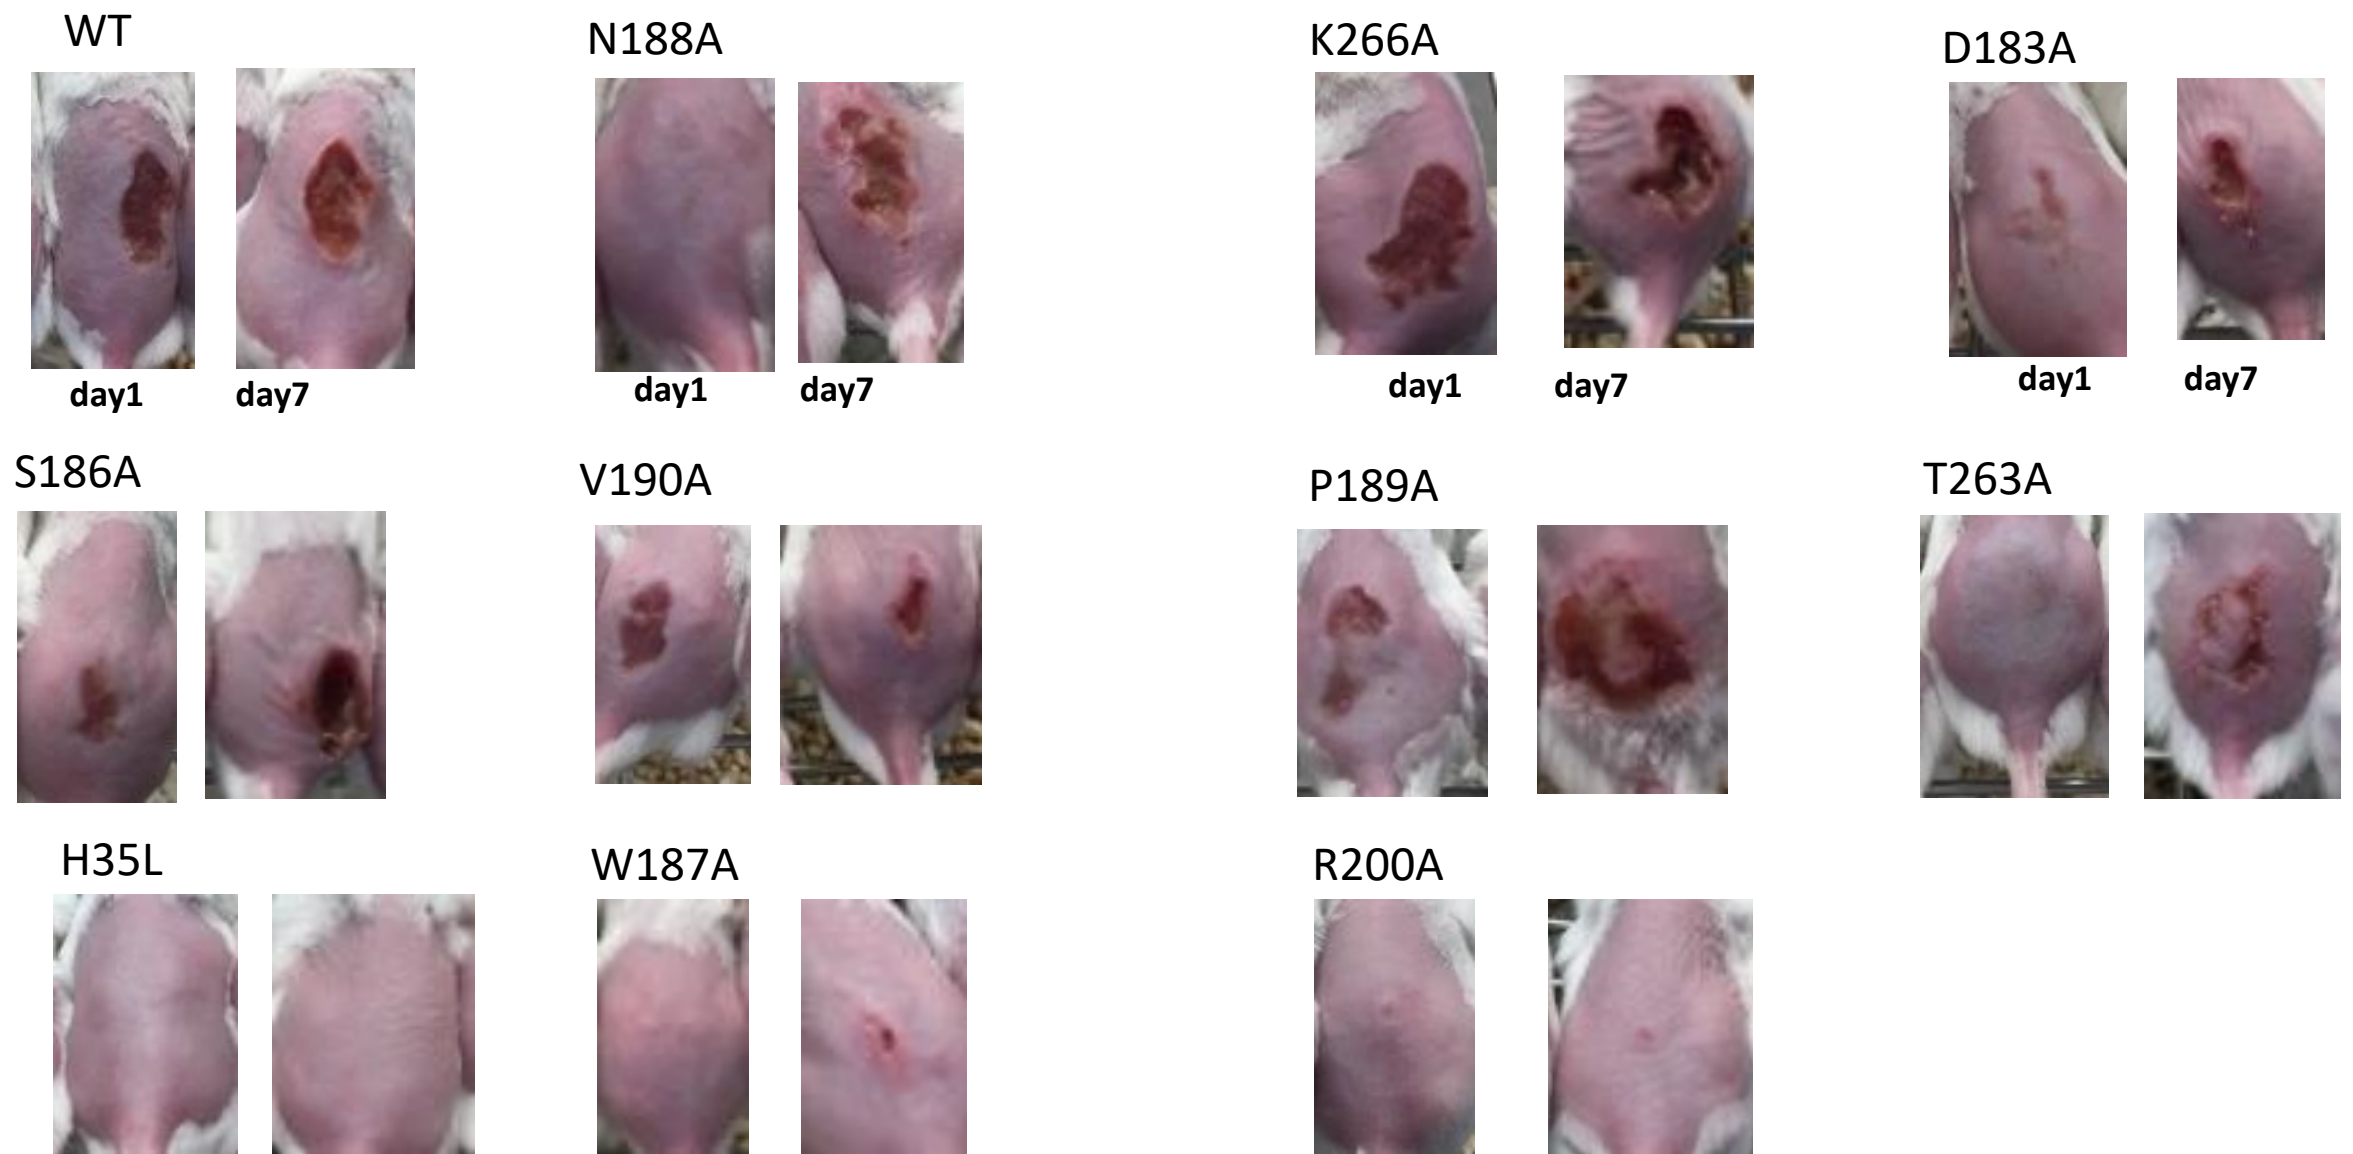

**Fig. S2: Purified toxin-induced dermonecrosis.** Balb/c mice (n=5) were injected intra-dermal with AT molecules (1 $\mu$ g). Wild type AT (WT) and AT<sub>H35L</sub> (H35L) were used as positive and negative controls, respectively. Lesions were recorded at days 1 and 7 post injection. The data are representative of 3 independent experiments.

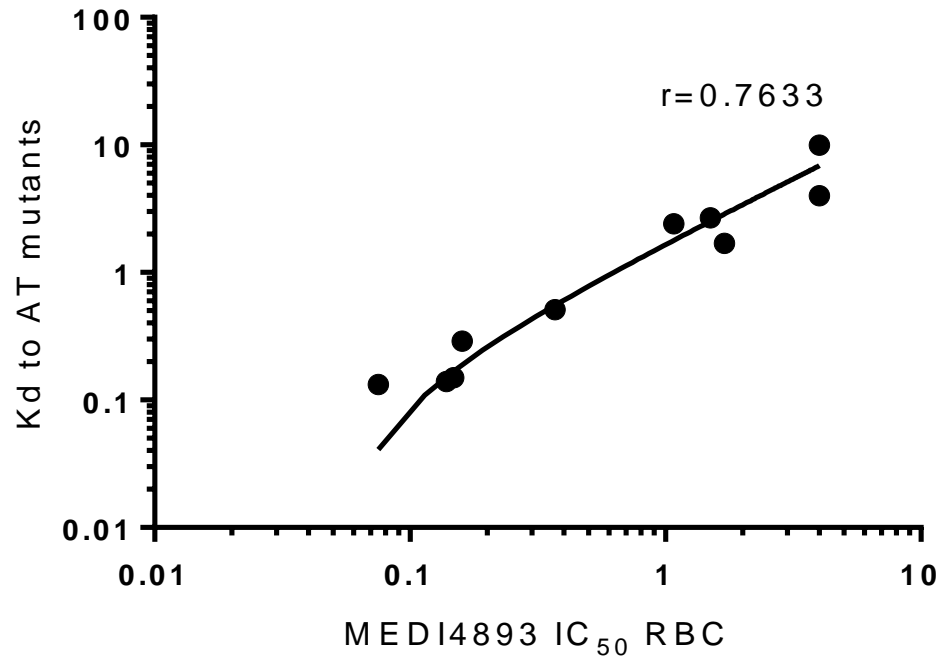

**Fig. S3: Correlation between MEDI4893 neutralization in hemolysis and KD binding to mutants.** Linear regression constant was measured between Constant affinity binding (Kd) and in vitro activity (IC<sub>50</sub> in the hemolytic assay) for each AT mutant IC<sub>50</sub> were graphed and linear regression constant calculated.

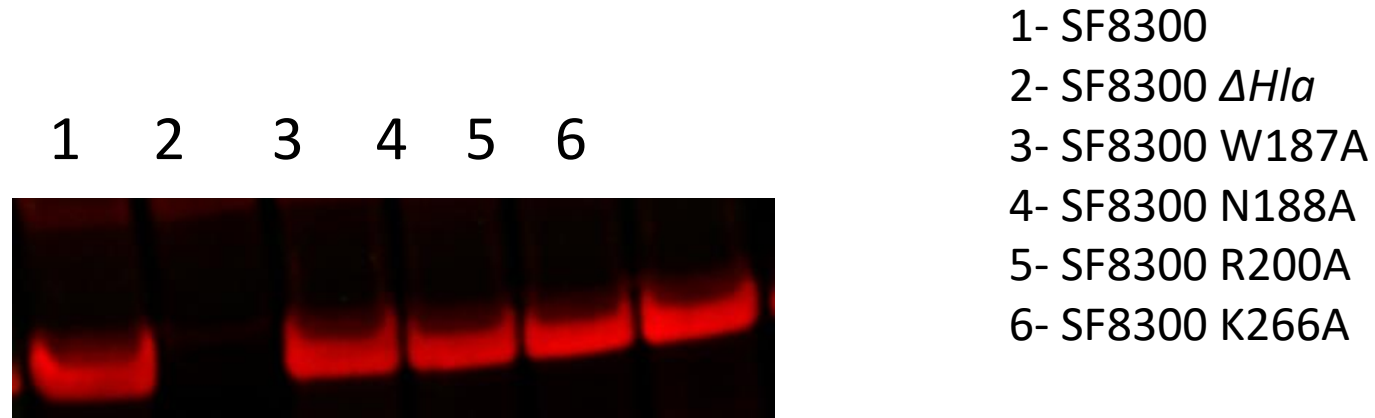

**Fig. S4: AT expression in SF8300 knock-in mutant**

Strains were cultured overnight in TSB, and AT level measured by western blot

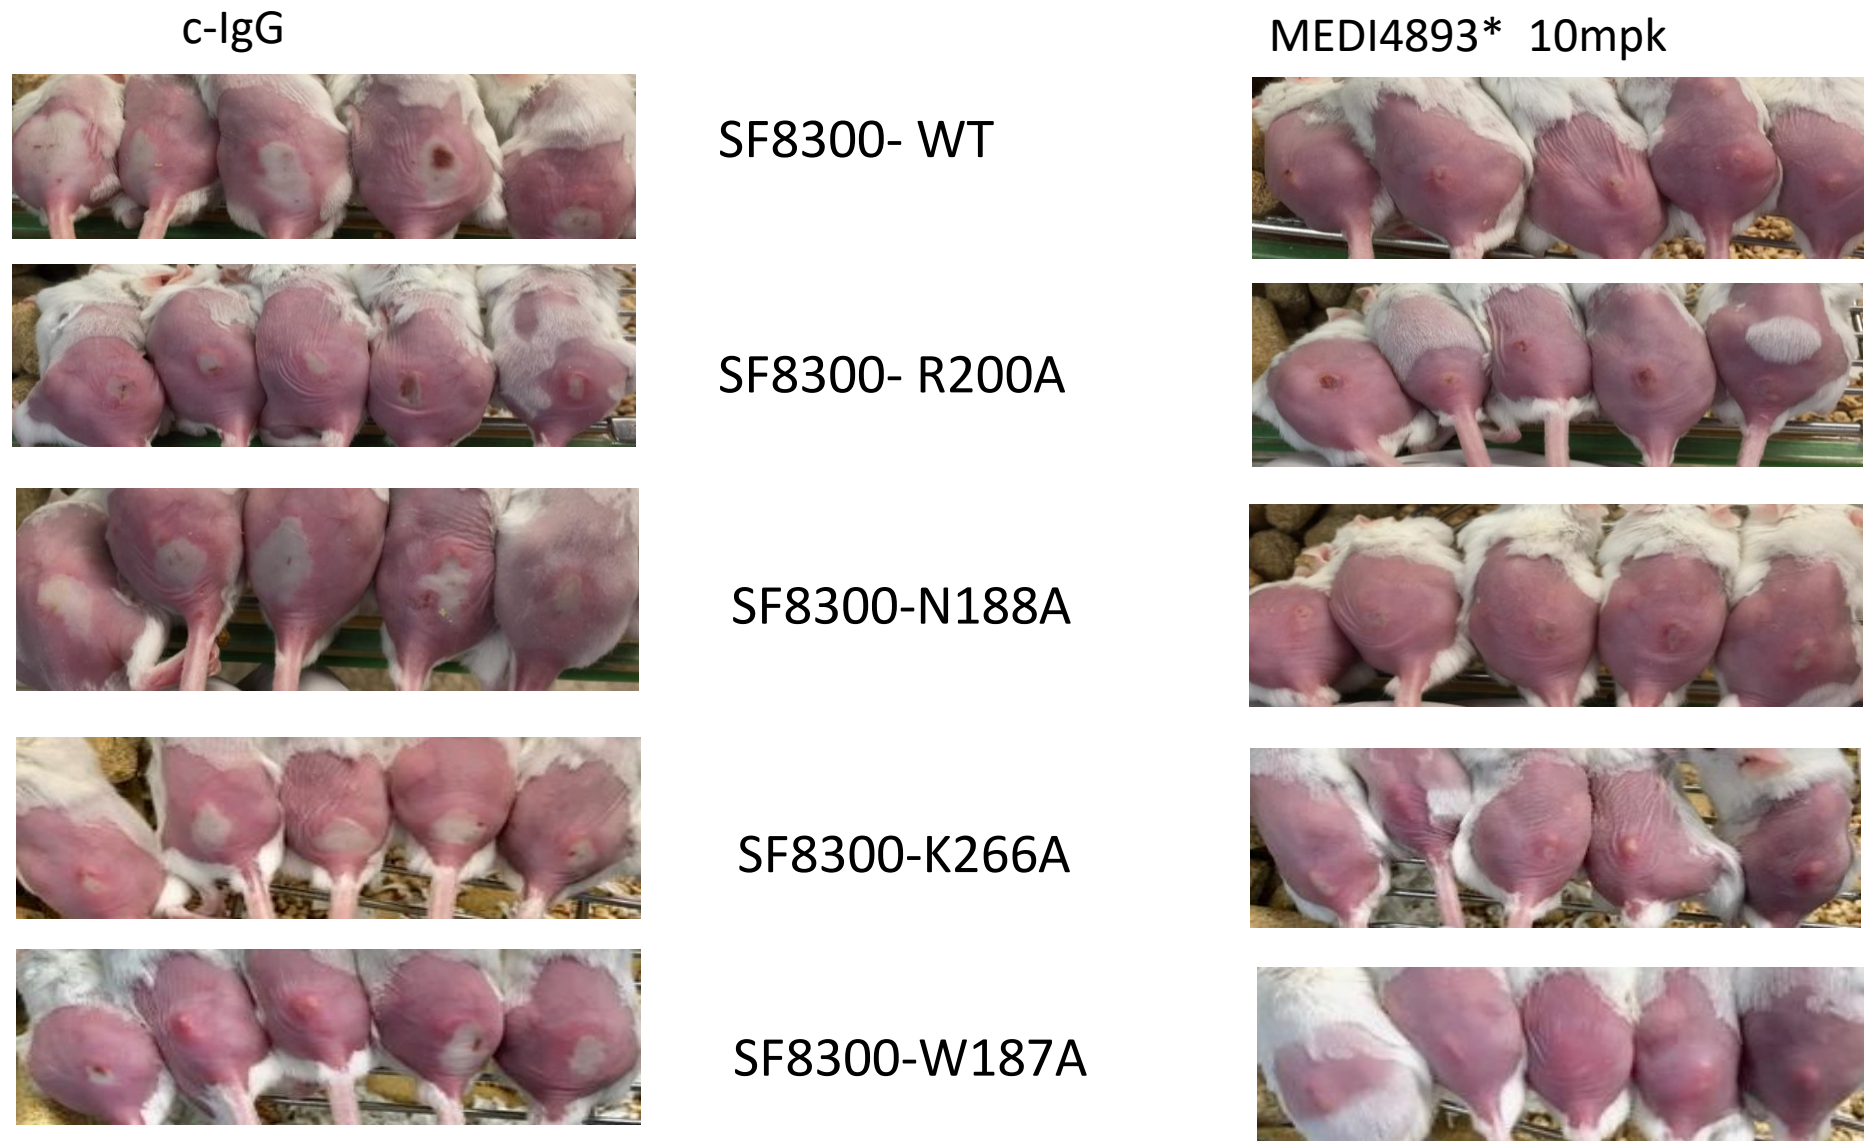

**Fig. S5: MEDI4893\* inhibits USA300 knock-in mutant induced-dermonecrosis.** Balb/c mice (n=10) were IP immunized with c-IgG or MEDI4893\* (10mpk), and ID injected with SF8300 WT or SF8300 knocking mutants (5e7cfu). Lesion sizes were photographically recorded 24h post infection. This experiment is representative of 3 independent experiments.

|           | H35L | WT  | D183A | S186A | W187A | N188A |
|-----------|------|-----|-------|-------|-------|-------|
| no mAb    | 307  | 415 | 216   | 62    | 24    | 28    |
| c-IgG     | 312  | 470 | 159   | 40    | 32    | 21    |
| MEDI4893* | 3    | 2   | 1     | 1     | 5     | 2     |

|           | P189A | V190A | R200A | T263A | K266A |
|-----------|-------|-------|-------|-------|-------|
| no mAb    | 68    | 58    | 5     | 160   | 79    |
| c-IgG     | 61    | 61    | 8     | 185   | 55    |
| MEDI4893* | 2     | 0     | 4     | 2     | 0     |

**Table S1:** Median of fluorescence intensity of AT mutants and nAT on A549 human cells in presence of anti-AT mAb (MEDI4893\*) or irrelevant mAb (c-IgG). Mean for staining control has been subtracted.
